# Supplementary material for: Selective control of reconfigurable chiral plasmonic metamolecules
Source: PubMed Central journal article supplement — Sci Adv. 2017 Apr 21;3(4):e1602803. doi: 10.1126/sciadv.1602803 (PMC5400443; doi:10.1126/sciadv.1602803), 2017-04-21
Supplement: 1602803_SM.pdf [file 1602803_SM.pdf]

## Supplementary Materials for **Selective control of reconfigurable chiral plasmonic metamolecules**

Anton Kuzyk, Maximilian J. Urban, Andrea Idili, Francesco Ricci, Na Liu

Published 21 April 2017, *Sci. Adv.* **3**, e1602803 (2017)

DOI: 10.1126/sciadv.1602803

### **This PDF file includes:**

- fig. S1. Scaffold/staple layout of the DNA origami template.
- fig. S2. Schematics of the DNA origami template.
- fig. S3. TEM images of the DNA origami templates after thermal annealing and agarose gel purification.
- fig. S4. Additional TEM images of the DNA origami-based metamolecules.
- fig. S5. CD response of the plasmonic metamolecules at different pH values with pH-insensitive locks.
- table S1. Staple sequences of the DNA origami template.
- table S2. Sequences of the pH-sensitive DNA locks.
- table S3. Thermal annealing temperatures and times.

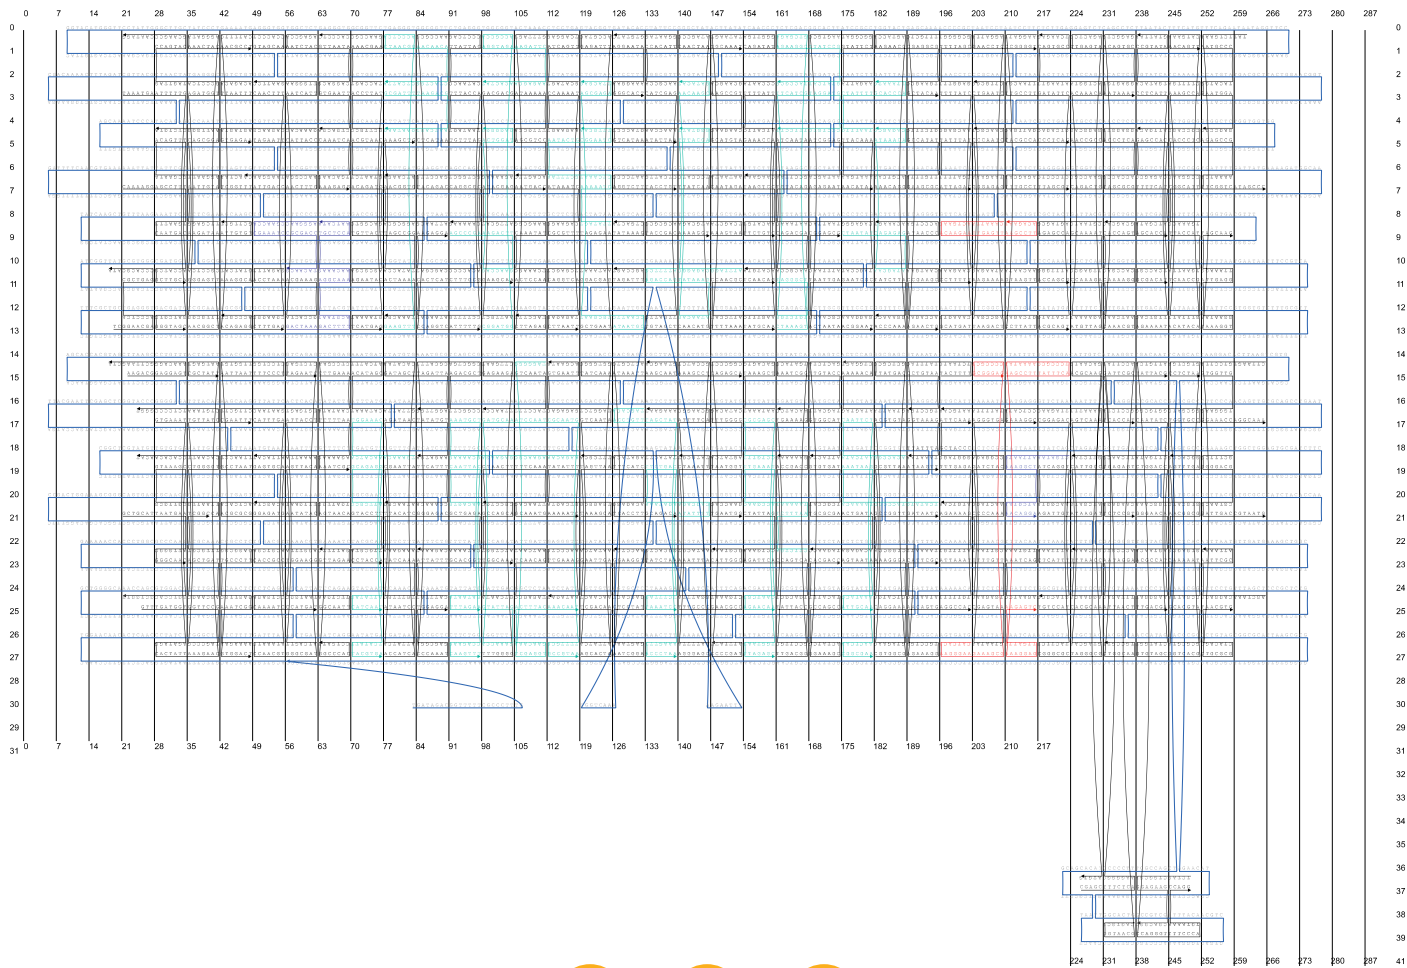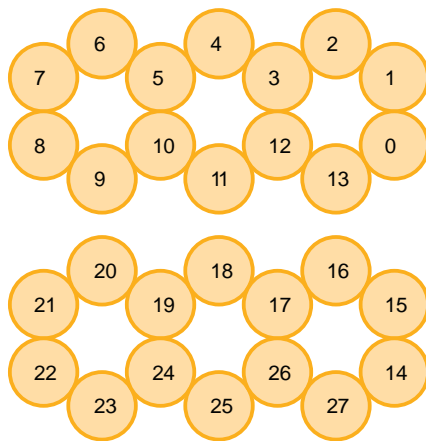

**fig. S1. Scaffold/staple layout of the DNA origami template.**

**table S1. Staple sequences of the DNA origami template.**

| Staples                                            | Length (nt) |               | Start   | End     |
|----------------------------------------------------|-------------|---------------|---------|---------|
| AACGAGCGTCTTTCGCCATATTTGTTTAGAAGCGCATTAGAC         | 42          | "core" staple | 4[202]  | 7[202]  |
| AGGTTTAACGTCGACACCGCCTGGAAGGGTTAGAAGATTTTC         | 42          | "core" staple | 22[62]  | 22[63]  |
| TACTTTTTCTAATCTATTTACAGAAAGGTGCCTGAAACAGTGAGGCCAC  | 49          | "core" staple | 15[196] | 25[202] |
| AAGAAGTCCAAAATTAGAGAGCTTAATT                       | 28          | "core" staple | 4[118]  | 13[118] |
| TTTGAGATGTTTTATAATCGCATTTCGC                       | 28          | "core" staple | 19[196] | 23[195] |
| AATTTTAATTTTCAGCAAGGCAAAGAAT                       | 28          | "core" staple | 26[146] | 16[133] |
| TCGACAAATTATCAGTCAATATAGGTCTGAGAGACGTGAATTACGAATA  | 49          | "core" staple | 25[119] | 14[112] |
| ACTCGTCAATCGGAGAGTAACCTCGTATGAGCACTGGAAGGTAACCTCA  | 49          | "core" staple | 14[132] | 22[126] |
| CTCATAATGTTTAGACACCCCCAGCGATAAGAGGA                | 35          | "core" staple | 5[84]   | 9[90]   |
| CATAACCTTATTACCCCTCAGAACCGCCCCAGGTCATTTTTG         | 42          | "core" staple | 2[97]   | 13[97]  |
| CCGGCTTAGACGCTCGGCTGACGCATTTCCCAAATGAGCGGATGGAGGA  | 49          | "core" staple | 16[97]  | 25[90]  |
| TGTCCATCACGCAAATTAACTTTGTAGACAATAGGAACCCGTCGGCAAAT | 49          | "core" staple | 25[217] | 22[224] |
| AATTAATTTTCCCTCTCCTGGTTGGTGTGTGGACT                | 35          | "core" staple | 15[42]  | 27[48]  |
| AGGGAGCGCCATCTAAAGCCTCAGAGCA                       | 28          | "core" staple | 27[140] | 15[153] |
| GTCAATACTAACTTTTTCAAATTAACACGCAAATGAAAAATC         | 42          | "core" staple | 24[104] | 21[118] |
| TATTCTGAAATAAAGGTGGAATAAATTGAGGTTAAAGGTAGCAAG      | 45          | "core" staple | 0[261]  | 9[258]  |
| TATACTTAGATACATTTTCATCACAGAGGTCACCTTGCAGACA        | 42          | "core" staple | 18[139] | 21[139] |
| GGCAATTTTCTGAATAATGGCAGTTACAAAAATTAATTACAT         | 42          | "core" staple | 25[63]  | 18[49]  |
| GAGATTTACCTAAAACGAAAGGCCACTAAATCATTTTGGGAAGAATTCC  | 49          | "core" staple | 10[55]  | 2[49]   |
| CCAAAGAAGAAAATACAAACAACTGGTAATAAGTTCAGTGCCTCAAGAG  | 49          | "core" staple | 11[224] | 0[217]  |
| GTGGTTGTGGGAAGGGAAACCAGGCAAA                       | 28          | "core" staple | 15[252] | 17[265] |
| CATACAGTTTGGGGAGTATCATAATGGTGAACCACTGAATGG         | 42          | "core" staple | 16[153] | 21[153] |
| AACCGCCGAGGCAGGTCAGACGATTGACCACGCCACCCTCAG         | 42          | "core" staple | 5[224]  | 5[223]  |
| GTTTGATGGTGGTTCCGTAGCCCGTGTATCCTGTAAATCTCCCCGGGT   | 49          | "core" staple | 25[25]  | 16[24]  |
| AACGGCTAGGGATAAACTACAACGCCT                        | 28          | "core" staple | 13[35]  | 1[48]   |
| GGAGGTTACCCTCAACCACCGTAGCGGTTTTTCATATCGATAAGCACCA  | 49          | "core" staple | 4[237]  | 9[244]  |
| CGAGTAAGTAATAAAGGGTGATATTTTAAATGCAA                | 35          | "core" staple | 25[203] | 16[196] |
| AGAATCCAAATCAGTTGTAAACGTTAATCCCCAAAACTAGCATGTCAA   | 49          | "core" staple | 24[216] | 20[196] |
| ACCATCACACATAAGATAGCTTAGATTAAGGTTGG                | 35          | "core" staple | 27[77]  | 16[84]  |

|                                                    |    |                  |         |         |
|----------------------------------------------------|----|------------------|---------|---------|
| GAGGTTTTTTTAGCGCGGGTTTTGCTCAGAACTG                 | 35 | "core"<br>staple | 2[202]  | 13[195] |
| AATATCAAACCCTCTTGAAAGGAATTGAAACAACCTAGTTAATTTTCGCA | 49 | "core"<br>staple | 22[125] | 18[119] |
| GAAACACCAGAACGAGTAGTAGTGAGAA                       | 28 | "core"<br>staple | 4[62]   | 5[48]   |
| AGCTAAACAGGAGGAATTCGCATTAAT                        | 28 | "core"<br>staple | 24[265] | 22[252] |
| AATTGCTGACGACGATAAAAAATTTGCCAAGCGTCCACAGTTC        | 42 | "core"<br>staple | 12[104] | 6[105]  |
| CTTGATATTCAACCTGAGAGTCTGGACCAAGGGATTTGACGA         | 42 | "core"<br>staple | 18[244] | 25[244] |
| AAAGAAATTACATCGGGAGACGCTGAGACATAAAACAGAAAT         | 42 | "core"<br>staple | 22[83]  | 22[84]  |
| AAGATTAGTATTCTGGCGGATAAGTGCCACTAATAACGGAAT         | 42 | "core"<br>staple | 2[181]  | 13[181] |
| TTTGCCCGAACGCCCTGAAATGGATTTACTAAATTTATGCGT         | 42 | "core"<br>staple | 25[140] | 18[140] |
| AAGGATTCCTTATTGTCAGATAGCCGAAGTGAATCCTTGCGG         | 42 | "core"<br>staple | 0[216]  | 2[203]  |
| CCTCATTTTGTACAGAAAATACATACACATGAAAAACAGTT          | 42 | "core"<br>staple | 3[238]  | 1[251]  |
| GCATAGTATCAGTTTCAGGAGGTTTAGTCTTAGAGTACCTTT         | 42 | "core"<br>staple | 2[118]  | 12[105] |
| ATTTAAACTCATTTTTTAACCAGGAACGCATTGCCGTTCTAG         | 42 | "core"<br>staple | 22[223] | 18[224] |
| CGTAATCAGTAGCGAGAGCCAGCAAAATTTGAGCCATTTGGGACCAGCG  | 49 | "core"<br>staple | 8[230]  | 11[223] |
| ATTAACGAGGCGCAAACGGTGATCAAGA                       | 28 | "core"<br>staple | 8[90]   | 6[77]   |
| GAGGCTGCAAACGTAATCAATCAAAAGGCACCGACCACCAGTGCAGCAC  | 49 | "core"<br>staple | 0[237]  | 8[231]  |
| AAACAGGACGTCAAAAATGAATTACAAATAGCCATATTTAACGGAGCG   | 49 | "core"<br>staple | 7[182]  | 9[174]  |
| AATACGTGGCACTGTATCTAAAAATTTACATTGGCGCGTAAG         | 42 | "core"<br>staple | 22[146] | 22[147] |
| TTAACGATTGCCTTGATATTCTCATATGACGCAGT                | 35 | "core"<br>staple | 2[216]  | 13[223] |
| TTCGAGGAATTGTAAGGAATTGCGAATAACAGTTTACCATCGGCTTGCA  | 49 | "core"<br>staple | 8[41]   | 11[34]  |
| AAGACGGAGGAGTAAACAGGGCTTAAGCTA                     | 30 | "core"<br>staple | 15[22]  | 14[18]  |
| GAGGAAACGCAAGGTAATTGAGAATCGCTATCTTAGGAAACC         | 42 | "core"<br>staple | 12[181] | 12[182] |
| ACAGACATTAATTTCAACTTTCGAAGGCCTTTGAG                | 35 | "core"<br>staple | 2[48]   | 13[55]  |
| ATGTTAGAGACTCCTTGAGTAACAGTGCGGAGTGTAATAAAT         | 42 | "core"<br>staple | 13[224] | 3[237]  |
| CAATATCCTATGGTGTGTAGCGGTCACGGTGCTGACCTCTAA         | 42 | "core"<br>staple | 17[238] | 15[251] |
| AATAAATTCGAGCTCAGGTCAGGACGAGTAGATTTAGCCAGT         | 42 | "core"<br>staple | 10[125] | 10[126] |
| CGGAGACTACTTCTCGGGCGCTAGGGCGGACAATGACGCAAGATGTG    | 47 | "core"<br>staple | 17[217] | 36[226] |
| TATTACCGCCTTGCTGAAAAGAACATCC                       | 28 | "core"<br>staple | 25[161] | 16[161] |
| TTTGGGGCTTGAATGAGAAGAGTCAATATACCTTTTTAACCT         | 42 | "core"<br>staple | 27[98]  | 16[98]  |
| CATTTATATTATTTGCACGGTTGGCAA                        | 28 | "core"<br>staple | 24[90]  | 23[104] |
| ACTAATCGGTTTATTGACCAACTTTGAACCGGATAAGGAACA         | 42 | "core"<br>staple | 6[46]   | 6[47]   |
| TGATTGCAGTAACAGTACCTTTTTCGTACCTACCA                | 35 | "core"<br>staple | 20[69]  | 23[76]  |
| GCACGTAGCGCGTATGGTGCCGGCGATCGGTGCGGGCCTCTATCACCAT  | 49 | "core"<br>staple | 25[245] | 17[237] |

|                                                    |    |                  |         |         |
|----------------------------------------------------|----|------------------|---------|---------|
| ACCAGAACCGAAGCCAATGAAATAACCCACCCTGAACAAAGT         | 42 | "core"<br>staple | 12[195] | 8[182]  |
| GGGAACAAGTAACAACGCCATCAAAAATCCGATTAAGTTTGAGGCACCG  | 49 | "core"<br>staple | 21[238] | 18[245] |
| ACCCAAAAGTACCAAAGAACGCGAGGCGTGAAGCCGCTACAA         | 42 | "core"<br>staple | 13[182] | 3[195]  |
| TTATCAATCCCATCCTCATTGAATCCCCAGGTC'TTTACCTGT        | 42 | "core"<br>staple | 7[140]  | 7[139]  |
| AGTAATAAAAGGGACTCATGGGCGTTAAATAAGTT                | 35 | "core"<br>staple | 23[175] | 19[195] |
| TTAACCTGCCTAATGAGTGCACCTGAGACAAAATCCCATGAT         | 42 | "core"<br>staple | 18[48]  | 25[62]  |
| CTATTAGCCTGAAAAGATTCACCAGTCATGACGCTACCGACCGAAAAAG  | 49 | "core"<br>staple | 21[154] | 18[161] |
| AGAGCCAAATCTACGTTAATACAGGACGGTGAATTCTGACGA         | 42 | "core"<br>staple | 0[62]   | 4[63]   |
| GGGAGTTAAAGGCAGTATCATCGCCTCACAGCGGAAATTGGGCTCTGTA  | 49 | "core"<br>staple | 11[35]  | 4[28]   |
| GTTATTACATAAATACATAGCATCATTTCTCCGAAGGCCACCCTGATT   | 49 | "core"<br>staple | 16[83]  | 26[63]  |
| CTTAAGTGTCTTACTGCGCGCTACAGGTAACGTG                 | 35 | "core"<br>staple | 14[265] | 25[258] |
| TTTGC GGAGATGGTGCCCTCATAGTTAGCCAGTACGCAAGCCCAATAGG | 49 | "core"<br>staple | 12[41]  | 0[21]   |
| GTGTGATTTCGCCATTGCGCGAACTGATAACAGAGATAGAACC        | 42 | "core"<br>staple | 19[168] | 22[168] |
| AATGCCCTACATGGGAATGGAGAGCCGC                       | 28 | "core"<br>staple | 1[252]  | 4[252]  |
| AGCACTAGGTGGGCTATCAAAATAAATTAAGCAATGTAAGCA         | 42 | "core"<br>staple | 27[119] | 14[133] |
| CAGAGGGTAATTACAATAAACTGTACAGAGAGAATAACATAA         | 42 | "core"<br>staple | 8[181]  | 7[181]  |
| CATTTGAATAAATCCCAACGTGGGCGATCTCTGACTAGAATC         | 42 | "core"<br>staple | 17[49]  | 15[62]  |
| AATAATACAATAGATAAGTCCAACATGTTTCTGTC                | 35 | "core"<br>staple | 6[153]  | 9[160]  |
| GCTGAATACCGTACGAGATTTAGGAATAAAAGGAAGGGCACT         | 42 | "core"<br>staple | 13[119] | 3[132]  |
| TATCAAATGTTTGGCGAATTATTCATTTCCAAACAATAACGG         | 42 | "core"<br>staple | 23[77]  | 20[77]  |
| GGGAGAGTAAGAAACGATTTTTATTTATCAAGAAACCTTTTT         | 42 | "core"<br>staple | 7[203]  | 11[202] |
| ATTAATTTTTGTTTGAGAAGGATCTACCCGGAGAGGGTAGCATTCAA    | 49 | "core"<br>staple | 23[196] | 17[202] |
| GTAGCAACCACCCTCATTTTCACAGAGGACCCGCT                | 35 | "core"<br>staple | 1[49]   | 12[42]  |
| TGAAACCCGGCATTCGGGAACCAGAGCCGAGCCACTACCGTGCGACAT   | 49 | "core"<br>staple | 8[251]  | 11[244] |
| AACGCCACCACATTGGAATAGGTGTATC                       | 28 | "core"<br>staple | 2[139]  | 0[126]  |
| TAGAGCCTCAACAGAATCAATATCTGGTGCCAGCACGCCTGC         | 42 | "core"<br>staple | 24[111] | 20[98]  |
| AGAAAAGGCTGGCTGACCTTCTACAGACCAGGCGCCAAAAAG         | 42 | "core"<br>staple | 6[104]  | 8[91]   |
| ATCATTCTTTTATTAAGTTTCATTCCATCCAACGCTCAACAG         | 42 | "core"<br>staple | 4[160]  | 11[160] |
| GCTTGCCACCTTATGTAATAATTCATGAG                      | 28 | "core"<br>staple | 4[76]   | 13[76]  |
| TAATAGTTTTACCACCTTTTGATAAGATCACTCATCTTTGCGGAAGCAA  | 49 | "core"<br>staple | 4[97]   | 11[104] |
| CAGACGAAACGCCAATCAATAATCGGAGAATAGCAGCCTTAACAAGAAA  | 49 | "core"<br>staple | 9[161]  | 6[154]  |
| ATCAGTTATTACCTTGTGAGTGAATAACCTTGCTTCGAATTT         | 42 | "core"<br>staple | 26[62]  | 17[48]  |
| TAGAATTCATTACCCAAATCATGACAAGAAAGAGG                | 35 | "core"<br>staple | 5[49]   | 7[69]   |

|                                                    |    |                  |         |         |
|----------------------------------------------------|----|------------------|---------|---------|
| CAGATATGGGTTGATATAAGTTTTTAAATATGCAA                | 35 | "core"<br>staple | 1[154]  | 13[160] |
| ACTCACAACGCGCGGGAGATGAATATACTTTGAATACAGCTA         | 42 | "core"<br>staple | 20[48]  | 20[49]  |
| CAAAAGGAGCCTTTTGAATTTCAATGACAAGATAAAATTGTGTGCTTGCT | 49 | "core"<br>staple | 7[21]   | 8[42]   |
| TCAACCGGTTTATTAAAGCCACTTTTGATGATACACCGTATAGTATTAA  | 49 | "core"<br>staple | 11[245] | 0[238]  |
| CATCGAGTTGATTCTGTAGCTCAACATGATAGCCCCAACTAATGCAAAAT | 49 | "core"<br>staple | 3[133]  | 1[153]  |
| TTTTATCCAAAGTTGCATGATTAAGACTAGGATTAGAACCTCCCGGGGT  | 49 | "core"<br>staple | 3[196]  | 1[216]  |
| AGAAAAGATTTTGTAAAATTCTGGCCAGCCGGTTGATAATC          | 42 | "core"<br>staple | 21[196] | 21[195] |
| AAAGTAATCAGCTAATGCAGAACGCGCCTACCGACAAAAGGT         | 42 | "core"<br>staple | 9[147]  | 9[146]  |
| AAAAGAAAAATCGGGAGTTGCTGCCCTTGAGGCGGTTTTCGTTCCGGC   | 47 | "core"<br>staple | 26[48]  | 21[39]  |
| AGCTGATAGCAAGCCTGGGGTCACAATTCCACACAACAT            | 39 | "core"<br>staple | 23[35]  | 18[24]  |
| ACTCCAATCAAAGCCAAATATAAAGCGGATTGCATATACGAGAATGACC  | 49 | "core"<br>staple | 11[105] | 7[111]  |
| ATAAATCCAGAAGCCGCGTTTTAGAGAATATAAAGCTGACTA         | 42 | "core"<br>staple | 7[112]  | 8[126]  |
| GCTTTCCGGGGACGCGTAACCGATTGACCGTAATG                | 35 | "core"<br>staple | 18[258] | 21[265] |
| ACAGATGGACGGTCTGTTACTTAGCCGGTATACCAAAAAGCTG        | 42 | "core"<br>staple | 7[70]   | 5[83]   |
| AAGAAAAGTAAGTTAACAATAATAAGAGCCCAATCCAACGCT         | 42 | "core"<br>staple | 11[203] | 4[203]  |
| CAGACTGGAACCGCCTCCCTCAGAGCAATTTGCCTTTAGCGT         | 42 | "core"<br>staple | 7[224]  | 7[223]  |
| AGAGCCGAAAATCATTTCGGTCATAGCCC                      | 28 | "core"<br>staple | 5[252]  | 7[265]  |
| TTACCATTGAATTACACCCTCCGCCAGCATTGACA                | 35 | "core"<br>staple | 9[245]  | 4[238]  |
| AAACCAAGTACCCTGTCATAAATATTAA                       | 28 | "core"<br>staple | 4[139]  | 5[139]  |
| ATAATCCATTATCAAGATAACTATATGTAAGATGA                | 35 | "core"<br>staple | 25[77]  | 18[84]  |
| GCTGCATTAATGAAATTGGGCGGGCAAC                       | 28 | "core"<br>staple | 21[21]  | 23[34]  |
| TCGGAACGAACCCTCACGCTGAGCCCACGCATA                  | 33 | "core"<br>staple | 13[19]  | 10[18]  |
| TACCAGTAAACGAAGAACCGCCACCCTC                       | 28 | "core"<br>staple | 2[76]   | 0[63]   |
| TAAAGCATGAGGCGGTTCAGTATATATTTAATAGAT               | 35 | "core"<br>staple | 21[119] | 24[112] |
| GTGAAATAGATAGGCACTATTAAGAACAATGAGTCGCTATT          | 42 | "core"<br>staple | 17[28]  | 15[41]  |
| ATTGTCACCAGGGTTTTCCCATGTAAAACCAGG                  | 33 | "core"<br>staple | 14[244] | 37[249] |
| GTGAGCGAACGGCGGTGCATCTGGCAAACAAGAGATCTCCGT         | 42 | "core"<br>staple | 22[251] | 21[237] |
| GTAATCTACGTAACAGCGCGAAGAATACACTAAAATAAACGG         | 42 | "core"<br>staple | 6[76]   | 12[77]  |
| CTTGAAACAATATATTTTTAAAGAAAACAAATCGC                | 35 | "core"<br>staple | 15[63]  | 19[69]  |
| CCCAATAGCAAGCAAAGCCGTCAAGAACGCATGTAGAAACCAACATGTA  | 49 | "core"<br>staple | 2[160]  | 10[154] |
| CATTAATTGCGTTGCGGTAAAGCGGTCCACGCTGGTT              | 37 | "core"<br>staple | 21[40]  | 24[21]  |
| AATAAATTAAGCTGACAGTGCGGCCCTCCCCGATATTTATT          | 42 | "core"<br>staple | 16[160] | 26[147] |
| AGATTGTATAAGATATCGATGAACGGTAATCAGGTGTACGCC         | 42 | "core"<br>staple | 21[217] | 24[217] |

|                                                   |    |                  |         |         |
|---------------------------------------------------|----|------------------|---------|---------|
| CGTGGCGGCTCGCCTTATGACCCTGTAATGCCTGA               | 35 | "core"<br>staple | 27[182] | 16[189] |
| CAGGAAAGTAGAAGACGTGTAGGTAAAGTAAATAA               | 35 | "core"<br>staple | 25[182] | 18[189] |
| GTAGCAAAGTCAAAAAAATTTTTAGAACCCTCATAGAAAGGC        | 42 | "core"<br>staple | 26[230] | 17[216] |
| GACTCTAGGAAAGCACTATCGGCCAGCCTACATTTACGACC         | 42 | "core"<br>staple | 14[174] | 23[174] |
| TTGACGGTGATACCAAATCGGTTGTACCTAGCATTGTGGCATATTACTA | 49 | "core"<br>staple | 27[161] | 18[168] |
| TCTAGCTGGCGAGGAGAAGCGACGGC                        | 26 | "core"<br>staple | 36[249] | 38[238] |
| TAAATGAATTTTTGGATCGTCGGGTAGC                      | 28 | "core"<br>staple | 3[21]   | 13[34]  |
| GTAATTAATAGTAGAAAAACACTGGAGT                      | 28 | "core"<br>staple | 16[188] | 14[175] |
| CGAGCTTTCTCAAAGGGGGGATTTCGCTATTACG                | 33 | "core"<br>staple | 37[226] | 15[244] |
| CAGTGCCGGTAACGACCTTATCTGGCAATGCCGTT               | 35 | "core"<br>staple | 38[237] | 26[231] |

| Modified staples 1                                               | Length<br>(nt) |                   | Start   | End     |
|------------------------------------------------------------------|----------------|-------------------|---------|---------|
| CGGATGGACCGCCAAGGTAGAAAGATTCAAGAGCAACACTAT<br>AAAAAAAAAA         | 52             | nanorod<br>handle | 13[98]  | 2[98]   |
| AACAGTGCAATTACGATAATATTTAGAA AAAAAAAAAA                          | 38             | nanorod<br>handle | 20[97]  | 25[97]  |
| CTAATATCAGAGAGATAGCAAATAAACACAGAGCC AAAAAAAAAA                   | 45             | nanorod<br>handle | 9[175]  | 4[182]  |
| AAGACAAAGAACCGGAGAAGAGCAAAAGAAATGCTCCAGAAGCAAGTTT<br>AAAAAAAAAA  | 59             | nanorod<br>handle | 18[118] | 27[97]  |
| TAGGGCTTGCTGGTTCATCGTAGGATGCCCTGTCTTTCCTT<br>AAAAAAAAAA          | 52             | nanorod<br>handle | 11[161] | 4[161]  |
| GTATTAGGAAACCAGATGCAAATCCAATCGCAATGTTTTGCGGCCGTAA<br>AAAAAAAAAA  | 59             | nanorod<br>handle | 25[98]  | 27[118] |
| GAAGTTTACCCTCACTAACGGAACAACACTACTGGCTCATTA<br>AAAAAAAAAA         | 52             | nanorod<br>handle | 13[77]  | 2[77]   |
| CTAAAGTGTGCGAGAAGAAGGCTTATCCGGTATCATTACCGCG<br>AAAAAAAAAA        | 52             | nanorod<br>handle | 13[161] | 2[161]  |
| TGAAACAAACATCATGGAAACTCATATTTACGTGA AAAAAAAAAA                   | 45             | nanorod<br>handle | 18[83]  | 27[76]  |
| AGCCCGAAAGACTTGAACCAGACTGGATGAGGGGG AAAAAAAAAA                   | 45             | nanorod<br>handle | 9[91]   | 4[98]   |
| CCTGTTTTCGCGAGCTGGTAATTTAGAGC AAAAAAAAAA                         | 38             | nanorod<br>handle | 18[160] | 27[160] |
| TTATAGTAAAAATCCTCAAATGCTTTAAAATACTGCGGAATCTTTGCAA<br>AAAAAAAAAA  | 59             | nanorod<br>handle | 8[125]  | 4[119]  |
| ATTCGCCGAGAGGATTATACCATCAAT AAAAAAAAAA                           | 38             | nanorod<br>handle | 20[76]  | 25[76]  |
| GCGATTTAAGACGAATCAGTGAATAAG AAAAAAAAAA                           | 38             | nanorod<br>handle | 3[77]   | 4[77]   |
| TCATATGTACCCCTAAAACAAAATAAGAAATACCATTGCAA<br>AAAAAAAAAA          | 52             | nanorod<br>handle | 20[195] | 25[181] |
| TAATTTGCTATTTTGCACCCATTAAATC AAAAAAAAAA                          | 38             | nanorod<br>handle | 4[181]  | 2[182]  |
| TAGCACAACCTGTTTAGCTATAAAGTTTACCCTAA AAAAAAAAAA                   | 45             | nanorod<br>handle | 16[132] | 27[139] |
| CTTCTGATCTTTAATAAAAAATACCGAACTTGAAATCAATCGTAGAACAA<br>AAAAAAAAAA | 59             | nanorod<br>handle | 22[167] | 25[160] |
| ACACCGGAATCATACAATTCTAACTCAACGGCGAA AAAAAAAAAA                   | 45             | nanorod<br>handle | 18[188] | 27[181] |
| ATTTTCGAGACCAGTATAAAGATAACAGAACAAGCGATACAT<br>AAAAAAAAAA         | 52             | nanorod<br>handle | 10[139] | 2[140]  |

|                                                                       |    |                |         |         |
|-----------------------------------------------------------------------|----|----------------|---------|---------|
| ATTTAGGCAGAGGCTTTACGAGGGTATT AAAAAAAAAA                               | 38 | nanorod handle | 10[153] | 4[140]  |
| TAGGGGCTCGAGGTGAACAAAACCTTTACAAACAAT AAAAAAAAAA                       | 45 | nanorod handle | 14[111] | 25[118] |
| ATAATGCCCAATTCTGCGAATAGCGAGATTACGAG AAAAAAAAAA                        | 45 | nanorod handle | 13[126] | 2[119]  |
| ATATTTTCAGCAGAAGATAAATTCTGACTCTTTAGTAAATCC AAAAAAAAAA                 | 52 | nanorod handle | 21[140] | 25[139] |
|                                                                       |    |                |         |         |
|                                                                       |    |                |         |         |
| <b>Right-handed DNA lock modifications</b>                            |    |                |         |         |
| GACTAAAGACTTTTACGTAATAGGCCAAAAACAAAGTGCTCCAAATCATA–<br>–tttt–duplex 1 | 73 | RH pH switch   | 13[56]  | 8[63]   |
| duplex 2–tttt–AGGGAACCGAACCACGAAATCCGCGACCTACAACG                     | 59 | RH pH switch   | 8[62]   | 10[56]  |
| CTGATAAATTAATGAAAGGCTATCGTAAACAGGA–tttt–ssDNA                         | 59 | RH pH switch   | 18[223] | 21[216] |
| <b>Left-handed DNA lock modifications</b>                             |    |                |         |         |
| CATCACTAAGGGAAGAAAGCGCCCCGCTGCGGGAG–tttt–duplex 1                     | 59 | LH pH switch   | 26[202] | 15[209] |
| duplex 2–tttt–<br>–AAGCCTTTATTTTCATCCCGCCAAAATAAAAAGGAGTTGATTAAGAGTC  | 73 | LH pH switch   | 15[210] | 25[216] |
| CAAATTAAGTGAACACAAGAATTGAGTTAAGCCTTACAGAAT–<br>–tttt–ssDNA            | 66 | LH pH switch   | 8[209]  | 8[210]  |

<sup>1</sup> Modifications introduced to the staple strands are highlighted with bold fonts. Thymines used as spacers are highlighted with the lowercase font, t.

**table S2. Sequences of the pH-sensitive DNA locks.**

|            |          |                             |
|------------|----------|-----------------------------|
| 80% of TAT | Duplex1  | 5' TTCTTTTCTTTTCTTTTCTT 3'  |
|            | Duplex2  | 5' AAGAAAAGAAAAGAAAAGAA 3'  |
|            | ssDNA    | 5' TTCTTTTCTTTTCTTTTCTT 3'  |
| 70% of TAT | Duplex 1 | 5' TTCTCTTCTTCTTCTTTTCTT 3' |
|            | Duplex 2 | 5' AAGAAAAGAGAAGAAGAGAA 3'  |
|            | ssDNA    | 5' TTCTTTTCTTCTTCTTCTT 3'   |
| 60% of TAT | Duplex 1 | 5' TTCTCTTCCTCTCTTCTCTT 3'  |
|            | Duplex 2 | 5' AAGAGAAGAGAGGAAGAGAA 3'  |
|            | ssDNA    | 5' TTCTCTTCTCTCCTTCTCTT 3'  |
| 50% of TAT | Duplex 1 | 5' TTCTCCTCCTCTCTCCTCTT 3'  |
|            | Duplex 2 | 5' AAGAGGAGAGAGGAGGAGAA 3'  |
|            | ssDNA    | 5' TTCTCCTCTCTCCTCCTCTT 3'  |



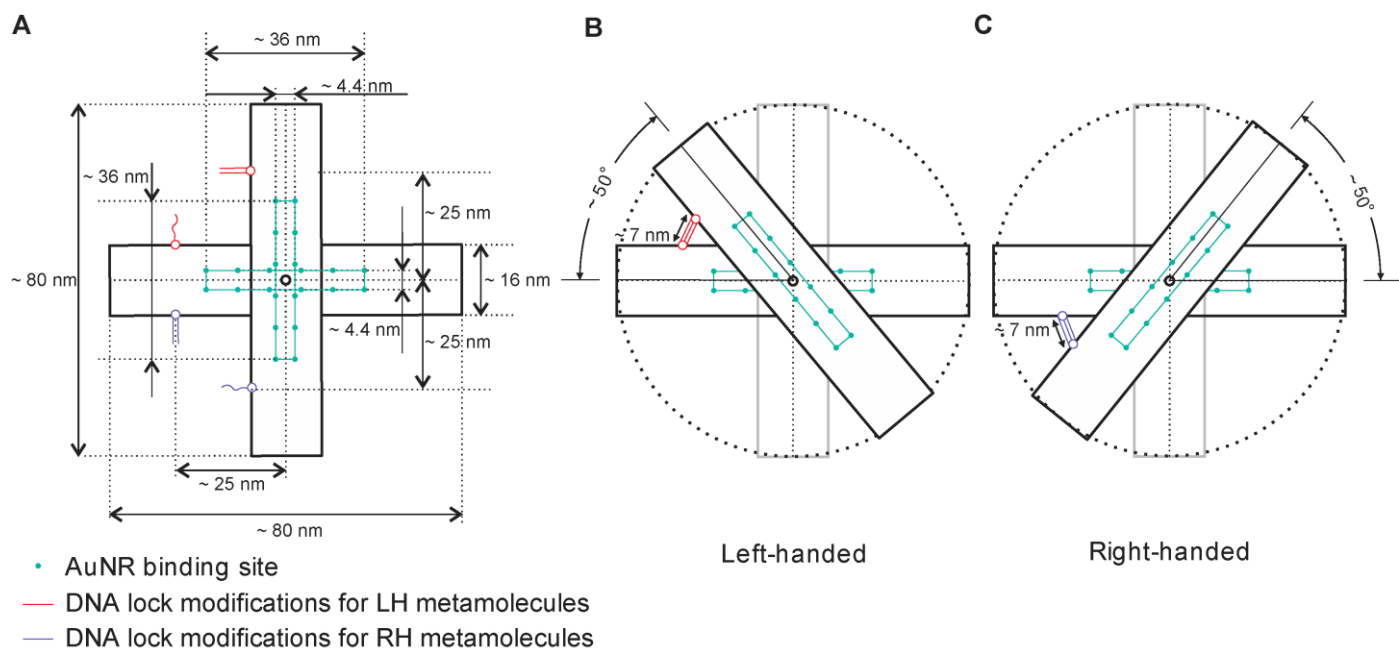

**fig. S2. Schematics of the DNA origami template.**

**table S3. Thermal annealing temperatures and times.**

| Temperature, °C     | Time, min |
|---------------------|-----------|
| 80                  | 15        |
| 79, 78, ..., 72, 71 | 1         |
| 70, 69, 68          | 5         |
| 67, 66, 65, 64, 63  | 10        |
| 62                  | 15        |
| 61                  | 20        |
| 60                  | 30        |
| 59, 58, ..., 39, 38 | 60        |
| 37, 36              | 45        |
| 35                  | 30        |
| 34                  | 20        |
| 33, 32              | 10        |
| 31, 30, ..., 26, 25 | 5         |
| 24, 23, 22, 21      | 2         |
| 20                  | Hold      |

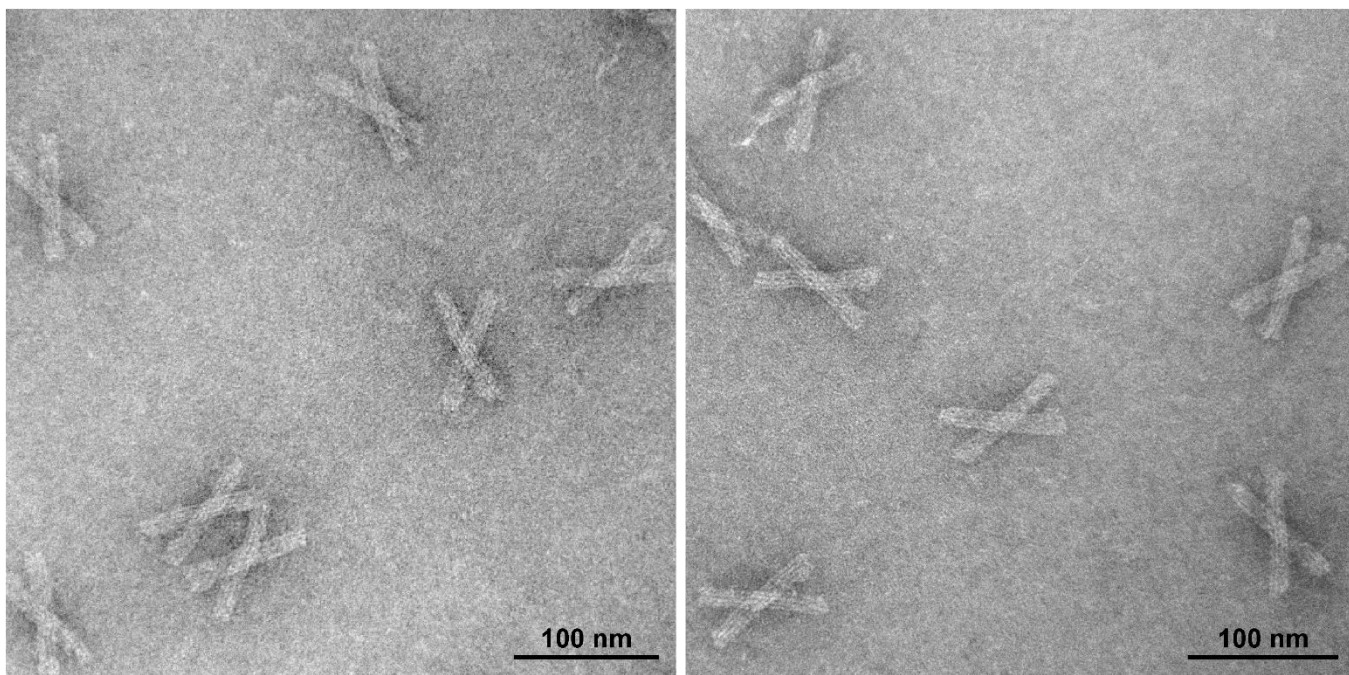

**fig. S3. TEM images of the DNA origami templates after thermal annealing and agarose gel purification.** Images were taken from the LH 80% DNA origami structures (pH = 8.3).

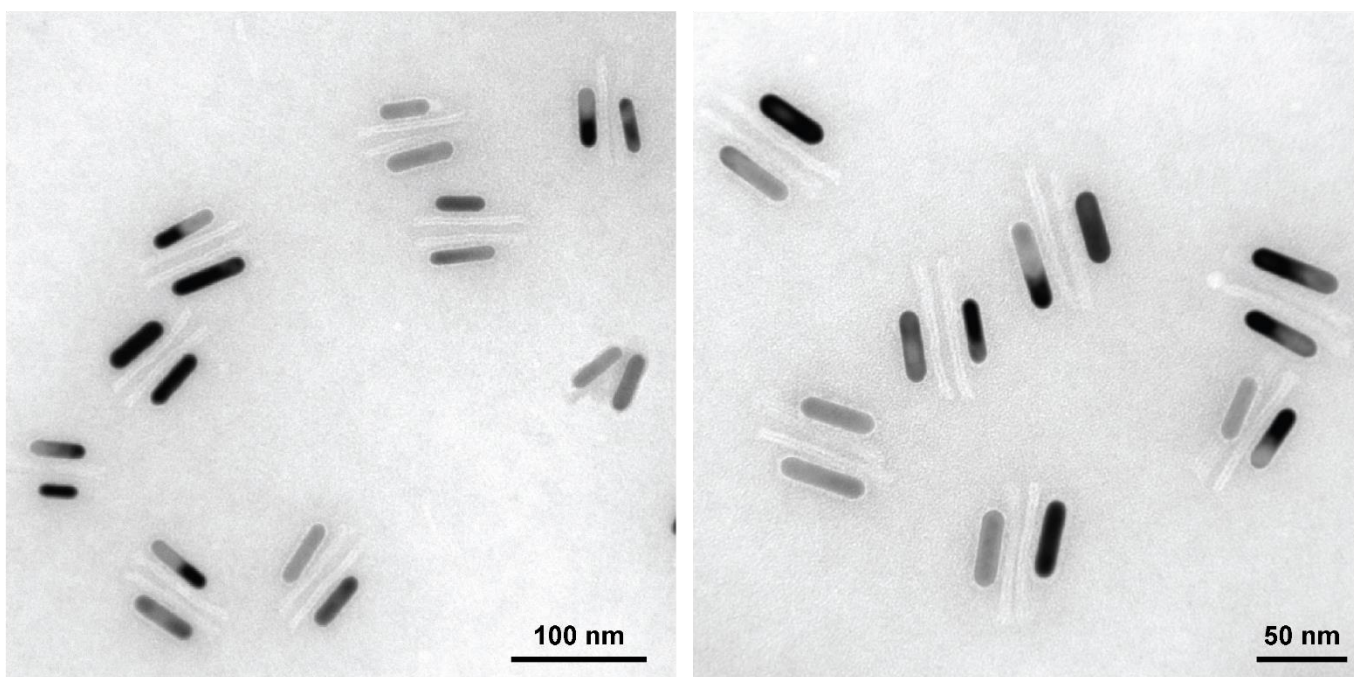

**fig. S4. Additional TEM images of the DNA origami-based metamolecules.**

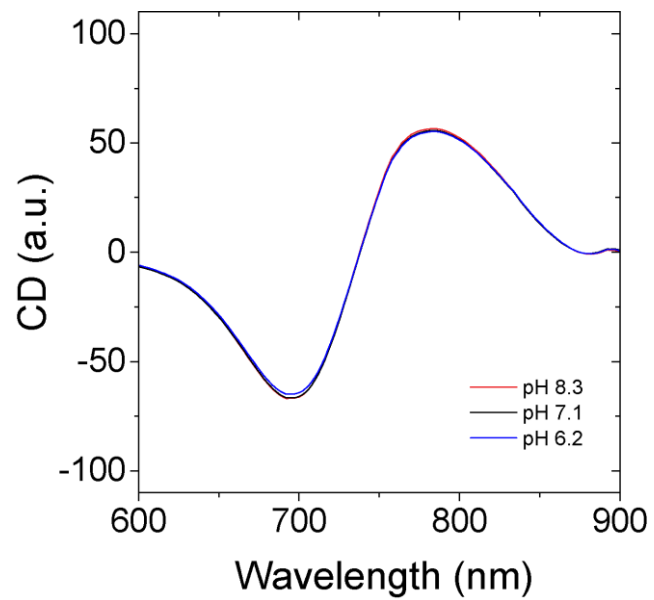

**fig. S5.** CD response of the plasmonic metamolecules at different pH values with pH-insensitive locks.
